# Supplementary material for: Cytomegalovirus infection after renal transplantation
Source: PubMed Central journal article supplement (PMC8852648; doi:10.25122/jml-2021-0209), 2022-01
Supplement: JMedLife-15-71-S.pdf [file JMedLife-15-71-S.pdf]

Table 1. Distribution of CMV viral loads according to the renal function.

|                     |                            |            | CMV viral load |             | Total  |
|---------------------|----------------------------|------------|----------------|-------------|--------|
|                     |                            |            | <800 copies    | >800 copies |        |
| Renal function Test | Normal serum creatinine    | Count      | 17             | 65          | 82     |
|                     |                            | %          | 20.7%          | 79.3%       |        |
|                     | Increased serum creatinine | Count      | 2              | 16          | 18     |
|                     |                            | %          | 11.1%          | 88.9%       |        |
| Total               |                            | Count      | 19             | 81          | 100    |
|                     |                            | % of Total | 19.0%          | 81.0%       | 100.0% |

CMV – Cytomegalovirus; Pearson's Chi-Square = 0.88, p-value = 0.34.

Table 2. Distribution of CMV viral loads based on CMV serology of donor (D) and recipient (R) status prior to renal transplant.

|                                         |                          |            | CMV viral load |             | Total  |
|-----------------------------------------|--------------------------|------------|----------------|-------------|--------|
|                                         |                          |            | <800 copies    | >800 copies |        |
| Serology of donor (D) and recipient (R) | R negative<br>D negative | Count      | 5              | 5           | 10     |
|                                         |                          | %          | 50.0%          | 50.0%       | 100.0% |
|                                         | R positive<br>D positive | Count      | 4              | 10          | 14     |
|                                         |                          | %          | 28.6%          | 71.4%       | 100.0% |
|                                         | R negative<br>D positive | Count      | 6              | 37          | 43     |
|                                         |                          | %          | 13.9%          | 86.1%       | 100.0% |
|                                         | R positive<br>D negative | Count      | 4              | 29          | 33     |
|                                         |                          | %          | 12.1%          | 87.9%       | 100.0% |
| Total                                   |                          | Count      | 19             | 81          | 100    |
|                                         |                          | % of Total | 19.0%          | 81.0%       | 100.0% |

CMV – Cytomegalovirus; Pearson's Chi-Square = 8.804, p-value = 0.03.

Table 3. Distribution of CMV viral loads according to the SVR at 12 weeks.

|       |     |            | CMV viral load |             | Total  |
|-------|-----|------------|----------------|-------------|--------|
|       |     |            | <800 copies    | >800 copies |        |
| SVR   | SVR | Count      | 100            | 0           | 100    |
|       |     | %          | 100.0%         | 0.0%        | 100.0% |
| Total |     | Count      | 100            | 0           | 100    |
|       |     | % of Total | 100.0%         | 0.0%        | 100.0% |

CMV – Cytomegalovirus; SVR – Sustained Virologic Response.
